# Supplementary material for: Physiological responses and transcriptomic changes reveal the mechanisms underlying adaptation of Stylosanthes guianensis to phosphorus deficiency
Source: PubMed Central journal article supplement (PMC8513372; doi:10.1186/s12870-021-03249-2), 2021-10-13
Supplement: 12870_2021_3249_MOESM4_ESM.pdf [file 12870_2021_3249_MOESM4_ESM.pdf]

Fig. S1

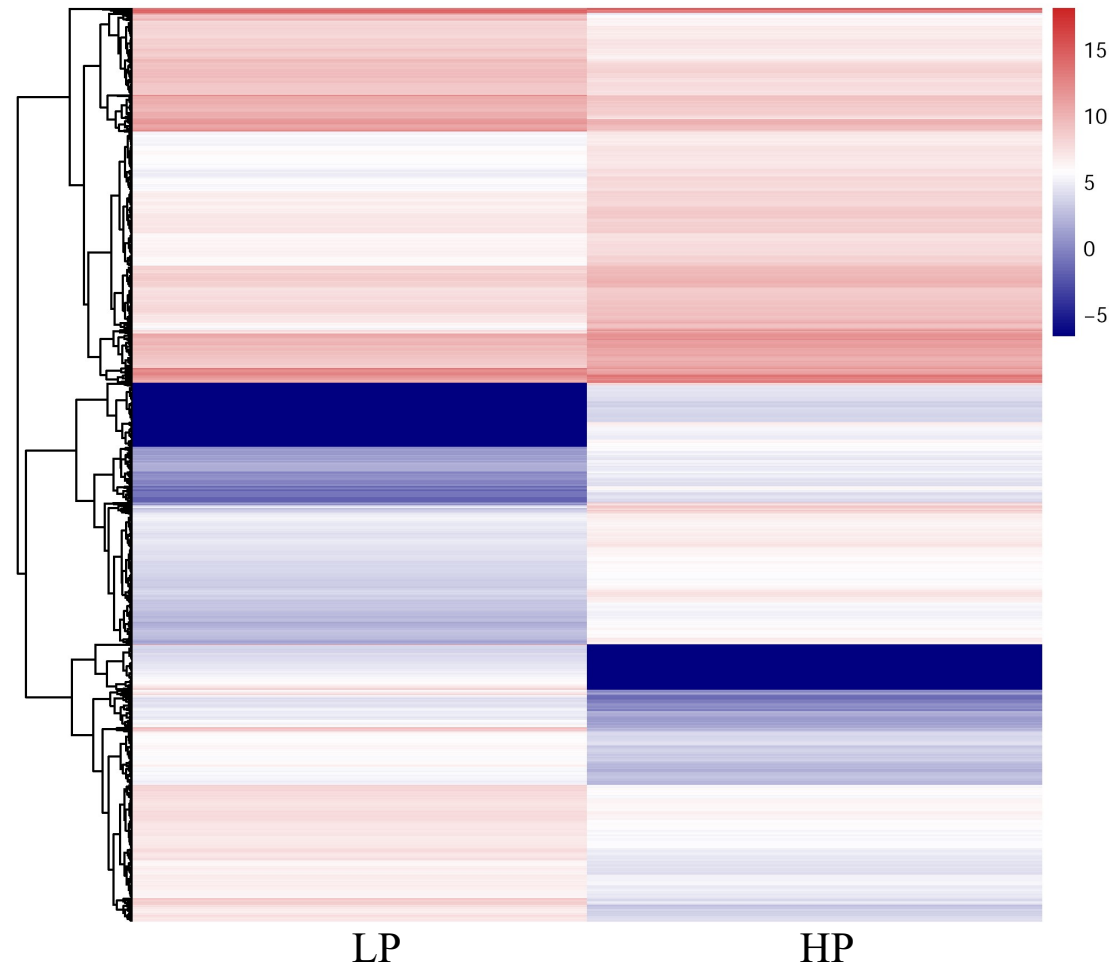

Fig. S1. Clustering analysis of the DEGs under two P conditions. The transcripts of DEGs were normalized as  $\log_2(\text{FPKM})$ . Expression levels ranged from red to blue indicate high to low expression for genes, respectively. LP and HP represent 0 and 250  $\mu\text{M}$   $\text{KH}_2\text{PO}_4$  supply treatments, respectively.
