# Supplementary material for: Physiological responses and transcriptomic changes reveal the mechanisms underlying adaptation of Stylosanthes guianensis to phosphorus deficiency
Source: PubMed Central journal article supplement (PMC8513372; doi:10.1186/s12870-021-03249-2), 2021-10-13
Supplement: 12870_2021_3249_MOESM11_ESM.pdf [file 12870_2021_3249_MOESM11_ESM.pdf]

Fig. S3

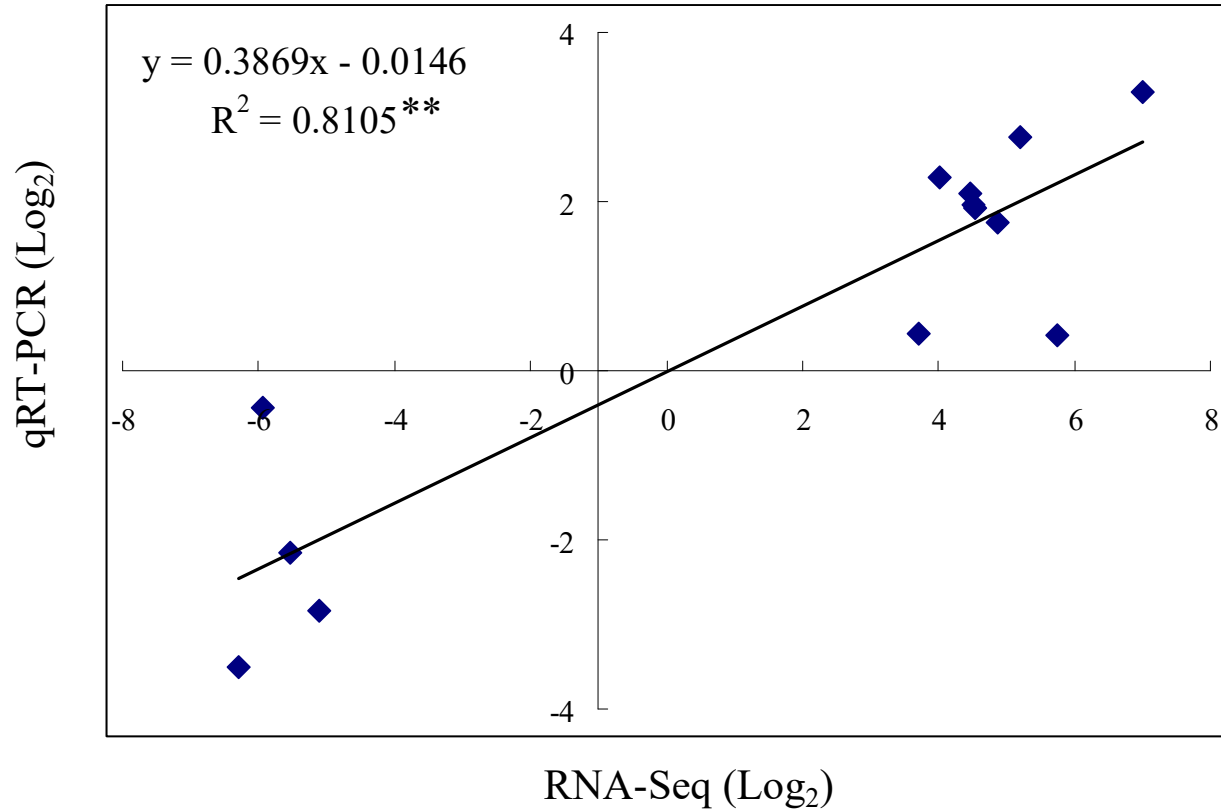

Fig. S3. Correlation analysis of gene expression between transcriptome data and qRT-PCR results. Nine up-regulated and four down-regulated DEGs were selected for qRT-PCR analysis. Transcriptome data were plotted against data from qRT-PCR. Data are presented on a log<sub>2</sub> scale.
